# Supplementary material for: Spatial separation of lithiophilic surface and superior conductivity for advanced Li metal anode: the case of acetylene black and N-doped carbon spheres
Source: Royal Society of Chemistry journal article supplement (doi:10.1039/c9ta00742c), 2019-01-01
Supplement: c9ta00742c1.pdf [file c9ta00742c1.pdf]

## Supporting information

### **Spatial Separation of Lithiophilic Surface and Superior Conductivity for Advanced Li Metal Anode: The Case of Acetylene Black and N-Doped Carbon Spheres**

*Feng Liang,<sup>a</sup> Liangdong Lin,<sup>a</sup> Zhenyu Feng,<sup>a</sup> Chenxiao Chu,<sup>a</sup> Jun Pan,<sup>a</sup> Jian Yang<sup>\*a</sup> and Yitai  
Qian<sup>ab</sup>*

<sup>a</sup> Key Laboratory of Colloid and Interface Chemistry, Ministry of Education, School of  
Chemistry and Chemical Engineering, Shandong University, Jinan 250100, P. R. China

E-mail: [yangjian@sdu.edu.cn](mailto:yangjian@sdu.edu.cn)

<sup>b</sup> Hefei National Laboratory for Physical Science at Microscale, Department of Chemistry,  
University of Science and Technology of China, Hefei 230026, P. R. China

## **Figures of Content:**

**Fig. S1** The electrical resistivity of AB, NCS.

**Fig. S2** The chemical structure of polydopamine.

**Fig. S3** XRD patterns (a) NCS, (b) AB respectively.

**Fig. S4** Raman spectrums of (a) NCS, (b) AB respectively.

**Fig. S5** Element maps of C, N and O of NCS.

**Fig. S6** (a) Nitrogen sorption isotherms, (b) pore-size distribution of NCS.

**Fig. S7** SEM image of NCS+AB.

**Fig. S8** Cross-sectional SEM images of (a, b, c) AB control electrodes, (d, e, f) NCS control electrodes, (g, h, i) NCS+AB electrodes. (a, d, g) original electrodes; (b, e, h) after 50 cycles; (c, f, i) after 100 cycles.

**Fig. S9** SEM images of super P in different magnifications.

**Fig. S10** SEM images of OCS.

## **Experimental Section**

### **Preparation of N-doped carbon submicrospheres (NCS)**

Typically, 0.6 mL of aqueous ammonia ( $\text{NH}_4\text{OH}$ , Sinopharm Chem., 28-30%), 90 mL of deionized water and 40 mL of ethanol (Sinopharm Chem., 99.7%), were mixed and stirred for 30 min at 30 °C. Then, 10 mL of 263.7 mM dopamine hydrochloride (Aladdin, 98%) was added into this solution. 30 h later, the dark brown precipitate was obtained by centrifugation and rinse three times by deionized water. Finally, the precipitate was dried at 60 °C overnight and calcined at 800 °C for 1 h in Ar.<sup>1</sup> The resultant powders were collected for structure characterization and Li anode protection.

### **Structure and Component Characterization of NCS**

Powder XRD patterns were obtained on a Bruker D8 X-ray diffractometer with graphite-monochromatized Cu K $\alpha$  line as a radiation source ( $\lambda=1.5418 \text{ \AA}$ ). Scanning electron microscope (SEM) images were recorded on a field-emission scanning electron microscope (Zeiss Gemini 300, Germany) with an energy dispersive X-ray (EDX) spectrometer (Bruker Quantax 200, Germany). Transmission electron microscope (TEM) images and high-resolution transmission electron microscope (HRTEM) images were acquired from transmission electron microscopes (JEOL JEM 1011 and JEOL 2100F, Japan). Raman spectra were measured on a LABRAM-HR confocal laser MicroRaman spectrometer, using an excitation wavelength of 514.5 nm as an excitation.  $\text{N}_2$  sorption isotherms were achieved on an ASAP 2020 HD88 surface area and porosity analyzer at 77 K. X-ray photoelectron spectra (XPS) was taken from ESCALAB 250 X-ray photoelectron spectrometer using monochromatic Al K $\alpha$  radiation. Digital four probe SZ82 tester was used to test the electrical resistivity of NCS and AB respectively.

## Electrochemical Performances

The electrochemical performances of Li anode modified by NCS and acetylene black (AB) were investigated with CR2032-type coin cells. In half cells, the working electrode was made of 80 wt% of NCS, 10 wt% of AB, and 10 wt% of SA (sodium alginate). These materials were milled in a trace of deionized water, until they lead to a viscous slurry. Then, the slurry was cast on a clean Cu foil and dried in vacuum at 60 °C for 24 h. The average mass loadings of NCS and AB on the Cu foil were approximately  $\sim 0.8$  and  $\sim 0.1$  mg cm<sup>-2</sup>. Finally, this foil was roll pressed and pouched into small discs with a diameter about 12 mm as the working electrodes. These working electrodes were coupled with Celgard 2400 membrane as the separator, and Li foil as the counter electrode in an argon-filled glove box (Mikrouna, Super 1220/750/900). Meanwhile, the electrolyte, *i.e.* 1 M lithium bis(tri-fluoromethane-sulphonyl)imide (LiTFSI) in 1,3-dioxolane (DOL) and 1,2-dimethoxyethane (DME) (volume ratio 1:1) containing 2% of lithium nitrate, were added to wet the separator. Galvanostatic cycling was conducted on a battery cyclor (Land CT2001A, China) at room temperature. The controls, where only NCS or AB was involved in the recipe, were also examined to illustrate their synergistic effect. It was noted that the amount of NCS or AB in the controls was kept as the same as that of NCS+AB, indicating the same carbon content in the electrode. In full cells, the commercial cathode material, LiFePO<sub>4</sub>, was used to further demonstrate the promising potential of NCS+AB for the stable cycling of Li anodes. LiFePO<sub>4</sub>, AB, and PVDF (poly (vinylidene fluoride)) in a weight ratio 8: 1: 1, were milled, then casted on an Al foil. After dried in vacuum overnight, the cathode was assembled with different anodes, (NCS+AB, or NCS, AB only) that had been plated with Li metal in advance. The mass loading of LiFePO<sub>4</sub> is 4.2 mg cm<sup>-2</sup> approximately.

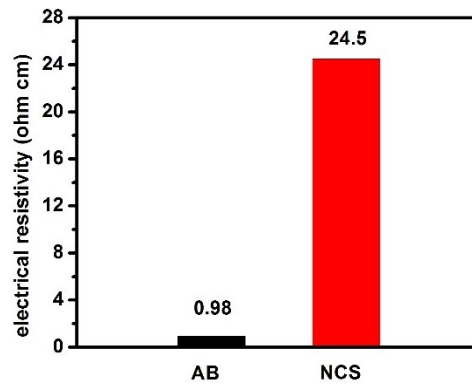

**Fig. S1** The electrical resistivity of AB, NCS.

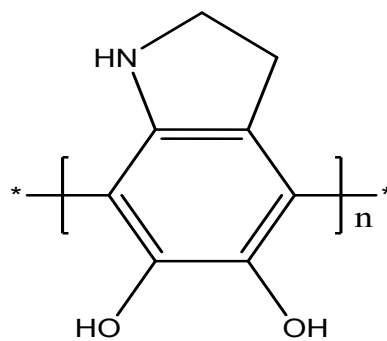

**Fig. S2** The chemical structure of polydopamine.

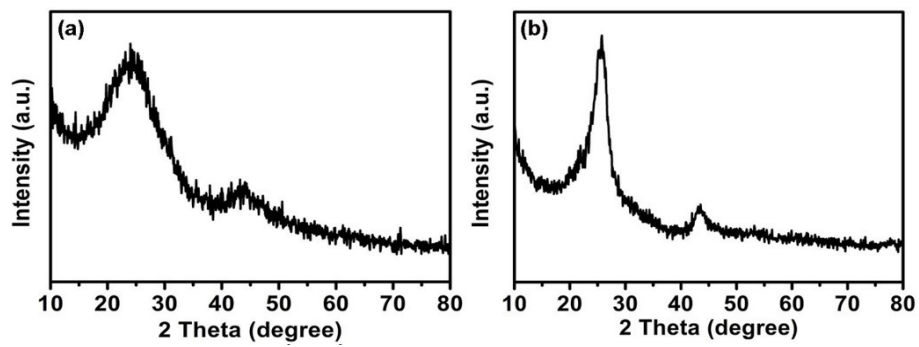

**Fig. S3** XRD patterns (a) NCS, (b) AB respectively.

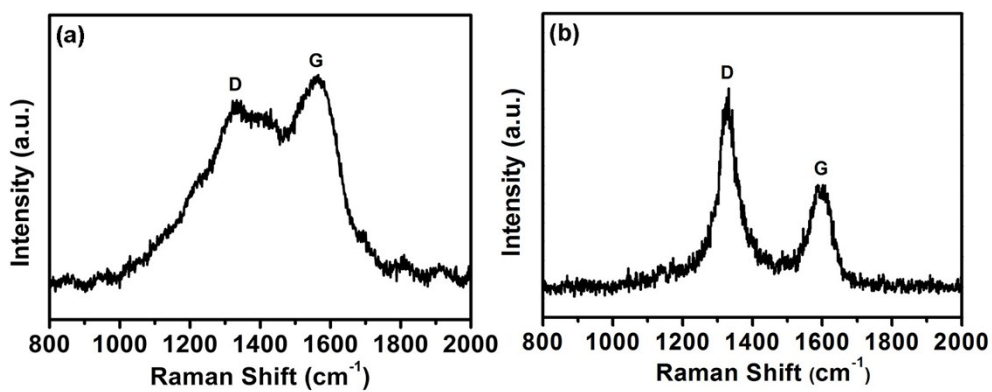

Fig. S4 Raman spectrums of (a) NCS, (b) AB respectively.

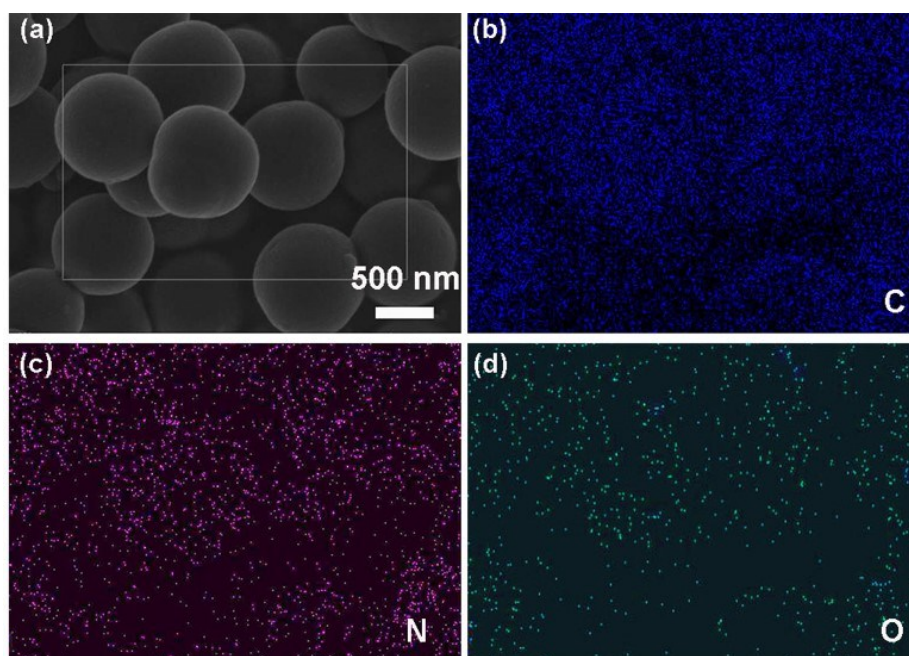

Fig. S5 Element maps of C, N and O of NCS.

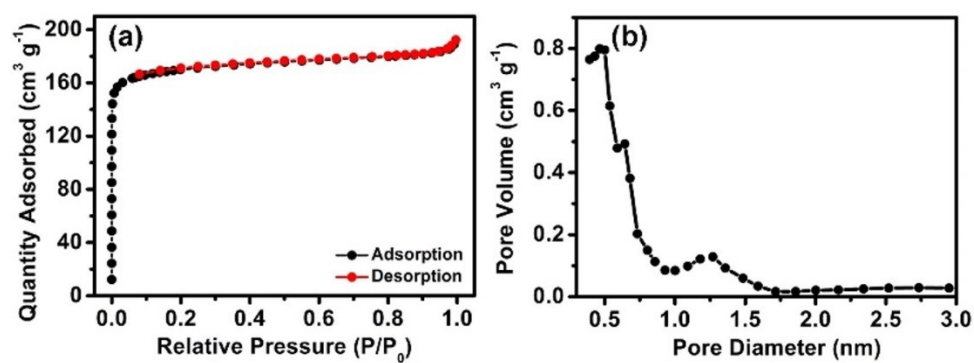

Fig. S6 (a) Nitrogen sorption isotherms, (b) pore-size distribution of NCS.

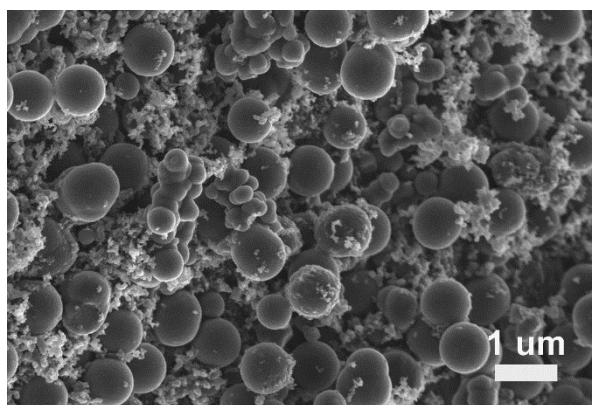

**Fig. S7** SEM image of NCS+AB.

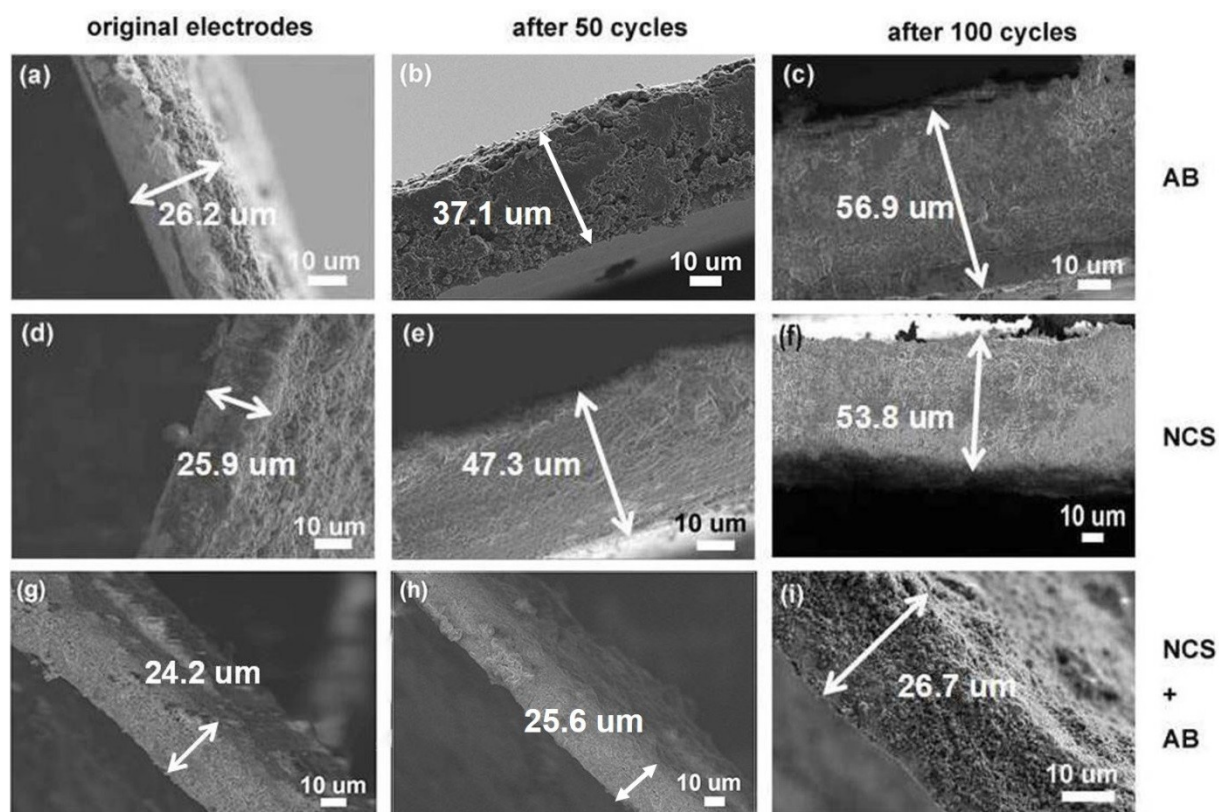

**Fig. S8** Cross-sectional SEM images of (a, b, c) AB control electrodes, (d, e, f) NCS control electrodes, (g, h, i) NCS+AB electrodes. (a, d, g) original electrodes; (b, e, h) after 50 cycles; (c, f, i) after 100 cycles.



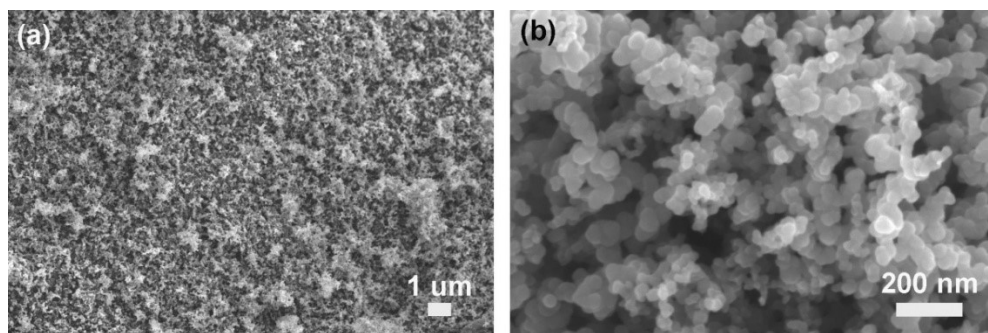

**Fig. S9** SEM images of super P in different magnifications.

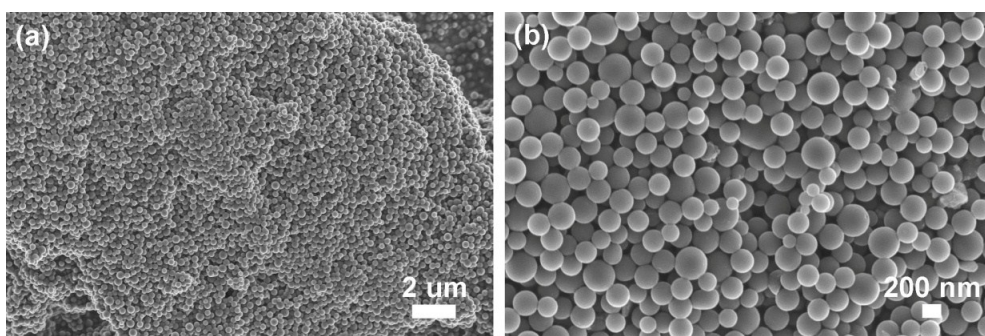

**Fig. S10** SEM images of OCS.

### Notes and references

1 Ai, K.; Liu, Y.; Ruan, C.; Lu, L.; Lu, G. M. *Adv. Mater.*, 2013, **25**, 998-1003.
